# Supplementary material
Source: MDPI journal article supplement (https://www.mdpi.com/search?q=diversity-11-00158)
Supplement: s001 [file diversity-11-00158-s001.pdf]

## Supplementary Materials:

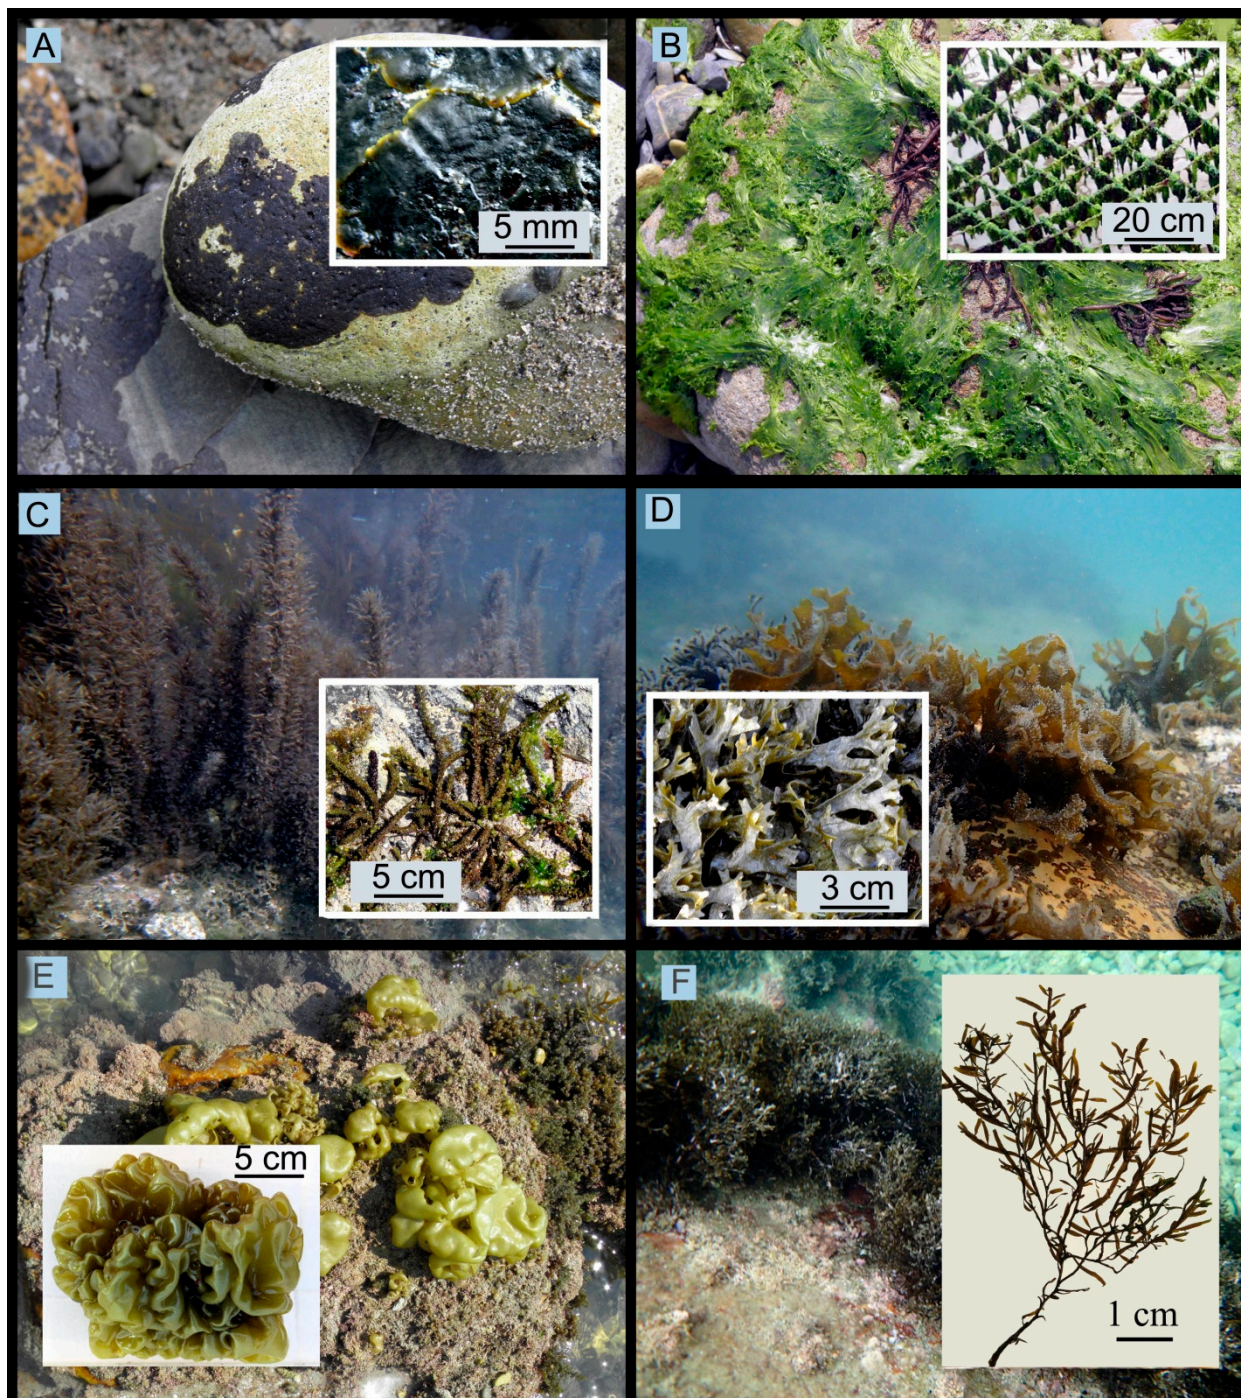

**Figure S1.** Algal communities in different tidal zones of the Tomioka Peninsula (Amakusa-Shimoshima Island). **(A)** Monodominant community of the brown crust alga *Neoralgsia expansa* in the upper intertidal zone of Magarizaki locality. **(B)** Monodominant community of the green thin membranous alga *Monostroma nitidum* with the accompanying red alga *Gloiopeltis furcata* in the middle intertidal zone of Magarizaki locality. **(C)** Monodominant community of the brown alga *Sargassum thunbergii* in the low intertidal zone of Tomioka Harbor. **(D)** Polydominant mosaic community composed of the brown algae *Ishige okamurae*, *I. foliacea* and the red algae *Caulacanthus ustulatus* and *Gloiopeltis furcata* in the low intertidal zone of Tomioka Harbor. **(E)** Polydominant community of the brown alga *Colpomenia sinuosa* and the red algae *Amphiroa beauvoisii* and *Centroceras*

*clavulatum* in the upper subtidal zone. (F) Monodominant community of the brown alga *Dictyopteria prolifera* in the upper subtidal zone of Shiraiwazaki locality.

**Table S1.** Sampling location, sampling points, number and time of samplings and number of samples and species.

| Sampling Location | Sampling Points (Figure 1) | Number and Time of Samplings               | Number of AT Samples | Number of UGA Samples | Number of Species |
|-------------------|----------------------------|--------------------------------------------|----------------------|-----------------------|-------------------|
| Akaiwa            | 4, 5, 6                    | 4 (No. 12; Ap. 13; Au. 13; Oc. 15)         | 144                  | 72                    | 108               |
| Magarizaki        | 7                          | 5 (De. 12; Ap. 13; Au. 13; Oc. 15; No. 17) | 60                   | 30                    | 106               |
| Shikizaki Bay     | 3                          | 3 (Ap. 13; Au. 13; Oc. 15)                 | 36                   | 18                    | 122               |
| Shiraiwazaki Bay  | 1, 2                       | 4 (Ap. 13; Au. 13; No. 15; No. 17)         | 96                   | 48                    | 217               |
| Tomioka Harbor    | 8, 9, 10, 11, 12           | 4 (Ap. 13; Au. 13; No. 15; No. 17)         | 240                  | 120                   | 169               |
| Tsujishima Islet  | 13, 14                     | 3 (Ap. 13; Au. 13; No.17)                  | 72                   | 36                    | 120               |
| In all localities | 14                         | 345                                        | 648                  | 324                   | 293               |

Time of samplings: Ap. 13, April 2013; Au. 13, August 2013; De. 12, December 2012; No. 15, November 2015; No. 17, November 2017; Oc. 15, October 2015. Abbreviations: AT – algal turf, UGA – upright growing algae.

**Table S2.** List of the recent marine flora of Tomioka Peninsula (Amakusa-Shimoshima Island) found in 2012-2017.

| Species, Varieties and Forms                                                                                                              | At | Lf             | Dg           | Tidal Zone |   |   | Findings in the 1950s | Locations of Findings in 2012-2017 |
|-------------------------------------------------------------------------------------------------------------------------------------------|----|----------------|--------------|------------|---|---|-----------------------|------------------------------------|
|                                                                                                                                           |    |                |              | um         | l | s |                       |                                    |
| DIVISION RHODOPHYTA                                                                                                                       |    |                |              |            |   |   |                       |                                    |
| CLASS STYLANEMATOPHYCEAE                                                                                                                  |    |                |              |            |   |   |                       |                                    |
| ORDER STYLONEMATALES                                                                                                                      |    |                |              |            |   |   |                       |                                    |
| Family Stylonemataceae                                                                                                                    |    |                |              |            |   |   |                       |                                    |
| <i>Chroodactylon ornatum</i> (C. Agardh) Basson ♣                                                                                         | +  | Ep             | T,S,M        | Ip         | + | + |                       | Mz, Swz, SzB, TB, TI               |
| <i>Stylonema alsidii</i> (Zanardini) K.M. Drew                                                                                            | +  | Ep<br>AS       | T,S,M        | Ip         | + | + | ◆                     | Mz, Swz, SzB, TB, TI               |
| CLASS COMSPOGONOPHYCEAE                                                                                                                   |    |                |              |            |   |   |                       |                                    |
| ORDER ERYTHROPELTIDALES                                                                                                                   |    |                |              |            |   |   |                       |                                    |
| Family ERYTHROTRICHIACEAE                                                                                                                 |    |                |              |            |   |   |                       |                                    |
| <i>Erythrotrichia carnea</i> (Dillwyn) J. Agardh ♣                                                                                        | +  | Ep<br>AS       | T,S,M,Ar, An | Ip         | + | + |                       | Ak, Mz, Swz, SzB, TB, TI           |
| <i>Erythrocladia irregularis</i> Rosenvinge ♣                                                                                             | ++ | Ez<br>Ep       | T,S,M,Ar, An |            | + | + |                       | Swz, SzB                           |
| <i>Sahlingia subintegra</i> (Rosenvinge) Kornmann ♣                                                                                       | ++ | Ep<br>Ez       | T,S,M        | Ip         | + | + |                       | Ak, Mz, Swz, SzB, TB               |
| CLASS BANGIOPHYCEAE                                                                                                                       |    |                |              |            |   |   |                       |                                    |
| ORDER BANGIALES                                                                                                                           |    |                |              |            |   |   |                       |                                    |
| Family Bangiaceae                                                                                                                         |    |                |              |            |   |   |                       |                                    |
| <i>Bangia fuscopurpurea</i> (Dillwyn) Lyngbye                                                                                             | +  | HS             | T,S,M,Ar, An | +          |   |   | ◆                     | Swz                                |
| <i>Bangia gloiopeltidicola</i> Tanaka ♣                                                                                                   | ++ | Ep             | S,P          | +          | + |   |                       | TB, Swz                            |
| <i>Bangiopsis dumontioides</i> (P. Crouan & H. Crouan) V. Krishnmurthy ♣                                                                  | +  | Ep             | T,S          |            | + |   |                       | Swz                                |
| <i>Pyropia suborbiculata</i> (Kjellman) J.E. Sutherland, H.G. Choi, M.S. Hwang & W.A. Nelson [= <i>Porphyra suborbiculata</i> Kjellman] ♣ | ++ | HS<br>ASE<br>z | T,S          | +          | + |   |                       | Swz, TB                            |
| <i>Pyropia ishigecola</i> (A. Miura) N. Kikuchi & M. Miyata ♣                                                                             | +  | Ep             | S, P         |            | + |   |                       | TB                                 |
| CLASS FLORIDEOPHYCEAE                                                                                                                     |    |                |              |            |   |   |                       |                                    |
| ORDER HILDENBRANDIALES                                                                                                                    |    |                |              |            |   |   |                       |                                    |
| Family Hildenbrandiaceae                                                                                                                  |    |                |              |            |   |   |                       |                                    |
| <i>Hildenbrandia rubra</i> (Sommerfelt) Meneghini ♣                                                                                       | ++ | HS             | T,S,M,Ar,An  | +          | + |   |                       | Ak, Mz, Swz, TB, TI                |
| ORDER ACROCHAETIALES                                                                                                                      |    |                |              |            |   |   |                       |                                    |
| Family Acrochaetiaceae                                                                                                                    |    |                |              |            |   |   |                       |                                    |
| <i>Acrochaetium catenulatum</i> M.A. Howe ♣                                                                                               | +  | Ep             | T,S,M,An     |            | + | + |                       | Swz, SzB, TB, TI                   |
| <i>Acrochaetium chaetomorphae</i> (Tanaka & Pham-Hoàng Hô) Heerebout ♣                                                                    | +  | Ep             | T,S,I-P      |            | + | + |                       | Swz                                |
| <i>Acrochaetium colaconemoides</i> Pham-Hoàng Hô ♣                                                                                        | +  | En             | T,S,P        |            | + | + |                       | Swz                                |

|                                                                                                            |     |          |              |   |   |   |                          |
|------------------------------------------------------------------------------------------------------------|-----|----------|--------------|---|---|---|--------------------------|
| <i>Acrochaetium microscopicum</i> (Nägeli ex Kützing) Nägeli ♣                                             | +   | Ep       | T,S,M,Ar     | + | + |   | Ak, Swz, SzB, TB, TI     |
| <i>Acrochaetium subseriatum</i> Børgesen ♣                                                                 | +   | Ep       | T,S,I-P      |   | + |   | SzB                      |
| ORDER NEMALIALES                                                                                           |     |          |              |   |   |   |                          |
| Family Galaxauraceae                                                                                       |     |          |              |   |   |   |                          |
| <i>Actinotrichia fragilis</i> (Forskål) Børgesen                                                           | ++  | HS       | T,S,I-P      | + | + | ◆ | TB, Swz, SzB             |
| <i>Dichotomaria falcata</i> (Kjellman) Kurihara & Masuda [=Galaxaura falcata Kjellman]                     | +   | HS       | T,S,I-P      |   | + | ◆ | Mz, TB                   |
| <i>Dichotomaria marginata</i> (J. Ellis & Solander) Lamarck [=Galaxaura veprecula Kjellman]                | +   | HS       | T,S          | + | + | ◆ | TB                       |
| <i>Dichotomaria papillata</i> (Kjellman) Kurihara & Masuda [=Galaxaura papillata Kjellman]                 | +   | HS       | T,S,P        | + | + | ◆ | SzB                      |
| <i>Galaxaura divaricata</i> (Linnaeus) Huisman & R.A. Townsend ♣                                           | +   | HS       | T,S          | + |   |   | Swz                      |
| <i>Galaxaura rugosa</i> (J. Ellis & Solander) J.V. Lamouroux [=Galaxaura subfruticulosa R. Chou]           | ++  | HS       | T,S          | + | + | ◆ | Ak, Swz, SzB, TB         |
| <i>Tricleocarpa cylindrica</i> (J. Ellis & Solander) Huisman & Borowitzka [=Galaxaura fastigiata Decaisne] | ++  | HS       | T,S          | + | + | ◆ | Ak, Mz, Swz, SzB, TI     |
| <i>Tricleocarpa fragilis</i> (Linnaeus) Huisman & R.A. Townsend ♣                                          | +   | HS       | T,S          | + | + |   | TI                       |
| Family Scinaiceae                                                                                          |     |          |              |   |   |   |                          |
| <i>Scinaia japonica</i> Setchell                                                                           | ++  | HS       | T,S,I-P      |   | + | ◆ | Ak, Mz, TB, TI           |
| <i>Scinaia latifrons</i> M. Howe [=Scinaia cottonii Setchell]                                              | +   | HS       | T,S,I-P      |   | + | ◆ | Mz                       |
| <i>Scinaia moniliformis</i> J. Agardh                                                                      | +   | HS       | T,S,I-P      |   | + | ◆ | TB                       |
| <i>Scinaia okamurae</i> (Setchell) Huisman [=Gloiophloea okamurae Setchell]                                | +   | HS       | S,P          |   | + | ◆ | Ak, Mz, TB, TI           |
| ORDER COLACONEMATALES                                                                                      |     |          |              |   |   |   |                          |
| Family Colaconemataceae                                                                                    |     |          |              |   |   |   |                          |
| <i>Colaconema daviesii</i> (Dillwyn) Stegenga ♣                                                            | +   | Ep       | T,S,M,Ar, An | + | + |   | Ak, Mz, Swz, SzB, TB     |
| <i>Colaconema gracile</i> (Børgesen) Ateweberhan & Prud'homme van Reine ♣                                  | +   | Ep       | T,S          | + | + |   | Swz, TB                  |
| <i>Colaconema hypneae</i> (Børgesen) A.A. Santos & C.W.N. Moura ♣                                          | ++  | Ep       | T,S          | + | + |   | Mz, Swz                  |
| <i>Colaconema robustum</i> (Børgesen) Huisman & Woelkerling ♣                                              | +   | Ep       | T,S          | + | + |   | Swz, TB                  |
| ORDER CORALLINALES                                                                                         |     |          |              |   |   |   |                          |
| Family Corallinaceae                                                                                       |     |          |              |   |   |   |                          |
| <i>Amphiroa anceps</i> (Lamarck) Decaisne [=Amphiroa dilatata J.V. Lamouroux]                              | +   | HS       | T,S,I-P      |   | + | ◆ | Ak, Mz, Swz              |
| <i>Amphiroa beauvoisii</i> J.V. Lamouroux ♣                                                                | +++ | HSA<br>S | T,S          | + | + |   | Ak, Mz, Swz, SzB, TB, TI |
| <i>Amphiroa echigoensis</i> Yendo ♣                                                                        | +   | HS       | T,S,P        | + |   |   | SzB                      |
| <i>Amphiroa ephedracea</i> Decaisne                                                                        | ++  | HS<br>AS | T,S          |   | + | ◆ | Ak, Swz, SzB, TB         |
| <i>Corallina aberrans</i> (Yendo) K.R. Hind & G.W. Saunders ♣                                              | +   | HS       | S,P          |   | + |   | TB, Swz, SzB             |
| <i>Corallina crassissima</i> (Yendo) K. Hind & G.W. Saunders [=Amphiroa crassissima Yendo]                 | ++  | HS       | S,P          | + | + | ◆ | Ak, Swz, SzB, TI         |
| <i>Corallina officinalis</i> Linnaeus                                                                      | +   | HS       | S,M,An       | + |   | ◆ | Ak                       |

|                                                                                                                                                            |     |            |           |    |   |   |   |                          |  |
|------------------------------------------------------------------------------------------------------------------------------------------------------------|-----|------------|-----------|----|---|---|---|--------------------------|--|
| <i>Corallina pilulifera</i> Postels & Ruprecht                                                                                                             | +++ | HS         | T,S,M,P   |    | + |   | ◆ | Ak, Mz, Swz, SzB, TB, TI |  |
| <i>Jania acutiloba</i> (Decaisne) J.H. Kim, Guiry & H.-G. Choi ♣                                                                                           | +   | HS         | T,S,(I-P) |    | + |   |   | Ak                       |  |
| <i>Jania adhaerens</i> J.V. Lamouroux                                                                                                                      | ++  | HS<br>Ep   | T,S       |    | + | + | ◆ | Ak, Mz, Swz, SzB, TB, TI |  |
| <i>Jania arborescens</i> (Yendo) Yendo ♣                                                                                                                   | +   | HS         | S,P       |    | + |   |   | Swz                      |  |
| <i>Jania capillacea</i> Harvey ♣                                                                                                                           | +   | HS<br>Ep   | T,S,I-P   |    | + |   |   | Mz, Swz, TI              |  |
| <i>Jania unguolata</i> f. <i>brevior</i> (Yendo) Yendo ♣                                                                                                   | +   | HS<br>Ep   | T,S,I-P   |    |   | + |   | Ak, Swz, SzB, TB, TI     |  |
| <i>Pneophyllum fragile</i> Kützinger ♣                                                                                                                     | ++  | Ep         | T,S,M     |    | + | + |   | Ak, Swz, SzB, TI         |  |
| Family Hydrolithaceae                                                                                                                                      |     |            |           |    |   |   |   |                          |  |
| <i>Hydrolithon boreale</i> (Foslie) Y.M. Chamberlain ♣                                                                                                     | +   | Ep         | T,S,M     |    | + | + |   | Mz                       |  |
| <i>Hydrolithon farinosum</i> (J.V. Lamouroux) D. Penrose & Y.M. Chamberlain ♣                                                                              | ++  | Ep<br>AS   | T,S,M     | Ip | + | + |   | Mz, Swz, SzB, TB, TI     |  |
| Family Lithophyllaceae                                                                                                                                     |     |            |           |    |   |   |   |                          |  |
| <i>Lithophyllum okamuræ</i> Foslie                                                                                                                         | ++  | HS         | T,S,I-P   |    | + | + | ◆ | Ak, Mz, Swz, SzB, TB, TI |  |
| <i>Lithophyllum tumidulum</i> Foslie ♣                                                                                                                     | +   | AS         | T,S,I-P   |    | + | + |   | Mz, SzB, TB              |  |
| ORDER BONNEMAISONIALES                                                                                                                                     |     |            |           |    |   |   |   |                          |  |
| Family Bonnemaisoniaceae                                                                                                                                   |     |            |           |    |   |   |   |                          |  |
| <i>Asparagopsis taxiformis</i> (Delile) Trevisan de Saint-Léon and <i>Falkenbergia hillebrandii</i> (Sporophytic stage of <i>Asparagopsis taxiformis</i> ) | +   | Ep<br>HS   | T,S       |    | + | + | ◆ | TB                       |  |
| <i>Bonnemaisonia hamifera</i> Hariot [= <i>Trailiella intricata</i> Batters]                                                                               | +   | Ep<br>Ez   | T,S,M     |    | + | + | ◆ | Swz, TB, TI              |  |
| ORDER CERAMIALES                                                                                                                                           |     |            |           |    |   |   |   |                          |  |
| Family Ceramiaceae                                                                                                                                         |     |            |           |    |   |   |   |                          |  |
| <i>Aglaothamnion cordatum</i> (Børgesen) Feldmann-Mazoyer ♣                                                                                                | +   | Ep         | T,S       |    | + |   |   | Swz                      |  |
| <i>Antithamnionella longicellulata</i> Perestenko ♣♣                                                                                                       | +   | Ep<br>HS   | S,M,P     |    | + |   |   | TB                       |  |
| <i>Centroceras clavulatum</i> (C. Agardh) Montagne                                                                                                         | +++ | ASE<br>pEz | T,S       | Ip | + | + | ◆ | Ak, Mz, Swz, SzB, TB, TI |  |
| <i>Ceramium aduncum</i> Nakamura ♣                                                                                                                         | +   | Ep         | T,S,I-P   |    | + |   |   | Swz, TI                  |  |
| <i>Ceramium borneense</i> Weber-van Bosse ♣                                                                                                                | ++  | Ep         | T,S,I-P   |    | + | + |   | Swz, SzB, TB             |  |
| <i>Ceramium boydenii</i> E.S. Gepp                                                                                                                         | +   | HS         |           |    | + |   | ◆ | Swz, TB                  |  |
| <i>Ceramium cimbricum</i> H.E. Petersen ♣                                                                                                                  | ++  | Ep         | T,S,M     |    | + | + |   | Mz, Swz, SzB, TB, TI     |  |
| <i>Ceramium macilentum</i> J. Agardh ♣                                                                                                                     | ++  | Ep         | T,S,I-P   |    |   | + |   | Swz, SzB                 |  |
| <i>Ceramium marshallense</i> E.Y. Dawson ♣                                                                                                                 | ++  | Ep         | T,S,I-P   |    | + |   |   | Swz                      |  |
| <i>Ceramium procumbens</i> Setchell & N.L. Gardner ♣                                                                                                       | +   | Ep         | T,S,I-P   |    | + | + |   | Mz, Swz                  |  |
| <i>Ceramium tenerimum</i> (G. Martens) Okamura                                                                                                             | ++  | HSE<br>pEz | T,S       |    | + | + | ◆ | Ak, Mz, Swz, SzB, TB, TI |  |
| <i>Ceramium vagans</i> P.C. Silva ♣                                                                                                                        | +   | Ep         | T,S       |    | + |   |   | TI                       |  |
| <i>Crouania attenuata</i> (C. Agardh) J. Agardh                                                                                                            | ++  | Ep         | T,S,M     |    | + | + | ◆ | Ak, Mz, Swz, SzB, TB, TI |  |

|                                                                                                                                      |     |          |           |    |  |   |   |   |                          |
|--------------------------------------------------------------------------------------------------------------------------------------|-----|----------|-----------|----|--|---|---|---|--------------------------|
| <i>Gayliella fimbriata</i> (Setchell & N.L. Gardner) T.O. Cho & S.M. Boo<br>[= <i>Ceramium fimbriatum</i> Setchell & N.L. Gardner] ♣ | ++  | Ep<br>Ez | T,S,I-P   |    |  | + |   |   | Ak, Mz, Swz, SzB, TB, TI |
| <i>Gayliella mazoyerae</i> T.O. Cho, Fredericq & Hommersand ♣                                                                        | +   | Ep<br>HS | T,S       | Ip |  | + | + |   | Ak, Swz, SzB, TB, TI     |
| <i>Pleonosporium segawae</i> Yoshida ♣<br>Family Dasyaceae                                                                           | +   | Ep       | S,P       |    |  | + | + |   | Swz, TB                  |
| <i>Dasya sessilis</i> Yamada ♣                                                                                                       | +   | HSE<br>P | T,S,M     |    |  | + |   |   | Mz, Swz, TB              |
| <i>Dasysiphonia japonica</i> (Yendo) H.-S.Kim [= <i>Heterosiphonia japonica</i><br>Yendo]                                            | +   | Ep       | T,S,M     |    |  | + |   | ◆ | Swz, TB,                 |
| <i>Heterosiphonia crispella</i> (C. Agardh) M.J. Wynne ♣                                                                             | +   | Ep       | T,S       |    |  | + |   |   | Swz                      |
| <i>Heterosiphonia pulchra</i> (Okamura) Falkenberg ♣<br>Family Delesseriaceae                                                        | +   | Ep       | T,S       |    |  |   | + |   | Mz, Swz, TB              |
| <i>Acrosorium polyneurum</i> Okamura ♣                                                                                               | +   | Ep       | S,P       |    |  | + | + |   | Swz, SzB                 |
| <i>Acrosorium yendoi</i> Yamada ♣                                                                                                    | +   | Ep       | T,S,M     |    |  | + |   |   | Mz, Swz, TB              |
| <i>Acrosorium uncinatum</i> (Turner) Kylin                                                                                           | +   | Ep       | T,S,M     |    |  |   | + | ◆ | Swz                      |
| <i>Hypoglossum attenuatum</i> N.L. Gardner ♣                                                                                         | +   | Ep       | T,S,I-P   |    |  |   | + |   | Swz                      |
| <i>Martensia denticulata</i> Harvey                                                                                                  | +   | HS       | T,S,I-P   |    |  |   | + | ◆ | SzB                      |
| <i>Taenioma perpusillum</i> (J. Agardh) J. Agardh<br>Family Rhodomelaceae                                                            | +   | Ep<br>HS | T,S       |    |  | + |   | ◆ | Mz, Swz, SzB             |
| <i>Acrocystis nana</i> Zanardini                                                                                                     | +   | HS       | T,S,I-P   | Ip |  | + |   | ◆ | Swz                      |
| <i>Bostrychia tenella</i> (J.V. Lamouroux) J. Agardh ♣                                                                               | +   | HS<br>Ez | T,S       |    |  | + |   |   | Swz                      |
| <i>Chondria crassicaulis</i> Harvey                                                                                                  | +   | HS       | T,S,M I-P | Ip |  | + |   | ◆ | TB                       |
| <i>Chondria dasyphylla</i> (Woodward) C. Agardh ♣                                                                                    | +   | Ep       | T,S, I-P  | Ip |  | + |   |   | Ak, TB                   |
| <i>Chondria intertexta</i> P.C. Silva [= <i>Chondria intricata</i> Okamura]                                                          | +   |          | T,S, I-P  |    |  |   | + | ◆ | Swz, TB                  |
| <i>Chondria minutula</i> Weber-van Bosse ♣                                                                                           | ++  | Ep       | T,S,I-P   |    |  |   | + |   | Ak, Mz, Swz, SzB, TI     |
| <i>Chondrophycus cartilagineus</i> (Yamada) Garbary & J.T. Harper<br>[= <i>Laurencia cartilaginea</i> Yamada] ♣                      | +   | HS       | T,S,I-P   |    |  |   | + |   | Mz, Swz                  |
| <i>Chondrophycus intermedius</i> (Yamada) Garbary & J.T. Harper<br>[= <i>Laurencia intermedia</i> Yamada]                            | ++  | HS<br>Ez | T,S       |    |  | + | + | ◆ | Ak, Swz, SzB, TB, TI     |
| <i>Chondrophycus undulatus</i> (Yamada) Garbary & Harper [= <i>Laurencia<br/>undulata</i> Yamada]                                    | +++ | HSA<br>S | T,S,I-P   |    |  | + | + | ◆ | Ak, Swz, SzB, TB, TI     |
| <i>Digenea simplex</i> (Wulfen) C. Agardh                                                                                            | +   | HS       | T,S       |    |  |   | + | ◆ | Swz                      |
| <i>Herposiphonia secunda</i> (C. Agardh) Ambronn ♣                                                                                   | ++  | Ep       | T,S       | Ip |  | + | + |   | Ak, Mz, Swz, SzB, TI     |
| <i>Herposiphonia secunda</i> f. <i>tenella</i> (C. Agardh) M.J. Wynne ♣                                                              | ++  | HSE<br>P | T,S       | Ip |  | + | + |   | Ak, Mz, Swz, SzB, TB, TI |
| <i>Herposiphonia subdisticha</i> Okamura ♣                                                                                           | +   | Ep       | T,S,I-P   |    |  | + |   |   | Swz, SzB                 |
| <i>Laurencia dendroidea</i> J. Agardh [= <i>Laurencia obtusa</i> var. <i>majuscula</i><br>Harvey]                                    | +   | HS       | T,S       |    |  | + |   | ◆ | Swz                      |
| <i>Laurencia okamurae</i> Yamada                                                                                                     | +   | HSA<br>S | T,S,I-P   |    |  | + | + | ◆ | Swz, TB                  |

|                                                                                                                                 |     |                |           |   |   |   |                          |
|---------------------------------------------------------------------------------------------------------------------------------|-----|----------------|-----------|---|---|---|--------------------------|
| <i>Laurencia pinnata</i> Yamada ♣                                                                                               | +   | Ep             | T,S,I-P   | + | + |   | Swz                      |
| <i>Leveillea jungermannioides</i> (K. Hering & G. Martens) Harvey                                                               | +   | Ep             | T,S,I-P   | + | + | ◆ | TB                       |
| <i>Lophosiphonia cristata</i> Falkenberg ♣                                                                                      | +   | Ep             | T,S       | + | + |   | Mz                       |
| <i>Melanothamnus ferulaceus</i> (Suhr ex J. Agardh) Díaz-Tapia & Maggs<br>[= <i>Polysiphonia ferulacea</i> Suhr ex J. Agardh] ♣ | ++  | Ep<br>HS       | T,S       | + |   |   | Ak, Mz, Swz, SzB         |
| <i>Melanothamnus japonicus</i> (Harvey) Díaz-Tapia & Maggs<br>[= <i>Polysiphonia japonica</i> Harvey]                           | +   | Ep             | T,S,I-P   | + | + | ◆ | SzB, TB, TI              |
| <i>Melanothamnus pseudovillum</i> (Hollenberg) Díaz-Tapia & Maggs<br>[= <i>Polysiphonia pseudovillum</i> Hollenberg] ♣♣         | +   | Ep             | T,S       | + |   |   | TB                       |
| <i>Melanothamnus yendoi</i> (T. Segi) Díaz-Tapia & Maggs [= <i>Polysiphonia yendoi</i> T. Segi]                                 | +   | Ep             | T,S,I-P   | + |   | ◆ | TB                       |
| <i>Polysiphonia howei</i> Hollenberg ♣                                                                                          | ++  | Ep             | T,S       | + | + |   | Ak, Swz, TB              |
| <i>Polysiphonia senticulosa</i> Harvey ♣                                                                                        | +   | Ez             | T,S,M     | + |   |   | TB                       |
| <i>Polysiphonia sphaerospora</i> Børgesen ♣                                                                                     | +   | HSE<br>p       | T,S       | + |   |   | Swz, TI                  |
| <i>Polysiphonia subtilissima</i> Montagne ♣                                                                                     | +   | Ep             | T,S       | + | + |   | Ak, SzB, TI              |
| <i>Polysiphonia villum</i> J. Agardh [= <i>Polysiphonia scopulorum</i> var. <i>villum</i> (J. Agardh) Hollenberg] ♣             | ++  | HSE<br>p       | T,S,M     | + |   |   | Ak, TB, Swz, SzB         |
| <i>Symphyocladia marchantioides</i> (Harvey) Falkenberg                                                                         | ++  | EpH<br>SAS     | T,S,M     |   | + | ◆ | Ak, Mz, Swz, SzB, TB     |
| <i>Symphyocladia pumila</i> (Yendo) S. Uwai & M. Masuda ♣                                                                       | ++  | EpH<br>S       | S,P       | + |   |   | Mz, Swz, SzB, TB, TI     |
| Family Wrangeliaceae                                                                                                            |     |                |           |   |   |   |                          |
| <i>Anotrichium tenue</i> (C. Agardh) Nägeli [= <i>Griffithsia tenuis</i> C. Agardh]                                             | ++  | Ep             | T,S       | + | + | ◆ | Ak, Mz, Swz, SzB, TB, TI |
| <i>Griffithsia japonica</i> Okamura                                                                                             | +   | Ep             | T,S,I-P   |   | + | ◆ | TI                       |
| <i>Griffithsia metcalfii</i> C.K. Tseng ♣                                                                                       | ++  | Ep             | T,S,I-P   | + | + |   | Swz, SzB                 |
| <i>Griffithsia rhizophora</i> Grunow ex Weber-van Bosse ♣                                                                       | +   | Ep             | T,S,I-P   |   | + |   | SzB                      |
| <i>Wrangelia argus</i> (Montagne) Montagne ♣                                                                                    | +   | HSE<br>p       | T,S       | + | + |   | Ak, Swz, SzB, TB, TI     |
| ORDER GELIDIALES                                                                                                                |     |                |           |   |   |   |                          |
| Family Gelidiaceae                                                                                                              |     |                |           |   |   |   |                          |
| [= <i>Gelidium divaricatum</i> G. Martens                                                                                       | +++ | HS<br>EzA<br>S | T,S,I-P   | + |   | ◆ | Ak, Mz, Swz, SzB, TB, TI |
| <i>Gelidium amansii</i> (J.V. Lamouroux) J.V. Lamouroux                                                                         | ++  | HSA<br>S       | T,S,I-P   | + | + | ◆ | Ak, Mz, Swz, SzB, TB, TI |
| <i>Gelidium crinale</i> Hare ex Turner Gaillon ♣                                                                                | ++  | HS             | T,S,M,An  | + |   |   | TB                       |
| <i>Gelidium elegans</i> Kützing ♣                                                                                               | ++  | HSA<br>S       | T,S,M,I-P | + | + |   | Ak, Mz, Swz, SzB, TB, TI |
| <i>Gelidium pacificum</i> Okamura ♣                                                                                             | ++  | HS             | S,M,P     | + | + |   | Ak, Swz, TB, TI          |
| <i>Gelidium pusillum</i> (Stackhouse) Le Jolis ♣                                                                                | ++  | HSE<br>p       | T,S       | + | + |   | Mz, Swz, SzB, TB, TI     |

|                                                                                                                                                                                                                         |     |                |           |   |   |   |   |                          |                          |
|-------------------------------------------------------------------------------------------------------------------------------------------------------------------------------------------------------------------------|-----|----------------|-----------|---|---|---|---|--------------------------|--------------------------|
| <i>Gelidium pusillum</i> var. <i>cylindricum</i> W.R. Taylor ♣                                                                                                                                                          | ++  | AS<br>HS       | T,S       | + | + |   |   | Swz, TI                  |                          |
| <i>Ptilophora subcostata</i> (Okamura) R.E. Norris [= <i>Gelidium subcostatum</i> Okamura]                                                                                                                              | +   | HSA<br>S       | S,P       |   |   | + | ◆ | Ak, SzB, TB              |                          |
| Family Gelidiellaceae                                                                                                                                                                                                   |     |                |           |   |   |   |   |                          |                          |
| <i>Millerella pannosa</i> (Feldmann) G.H. Boo & L. Le Gall [= <i>Gelidiella pannosa</i> (Feldmann) Feldmann & Hamel, <i>Parviphycus tenuissimus</i> B. Santelices, <i>Parviphycus pannosus</i> (Feldmann) G. Furnari] ♣ | +   | HS             | T,S       |   |   | + |   | Swz                      |                          |
| Family Pterocladaceae                                                                                                                                                                                                   |     |                |           |   |   |   |   |                          |                          |
| <i>Pterocladia capillacea</i> (S.G. Gmelin) Santelices & Hommersand ♣                                                                                                                                                   | +   | HS             | T,S,M     |   |   | + | + | Ak                       |                          |
| <i>Pterocladia tenuis</i> (Okamura) Shimada, Horiguchi & Masuda [= <i>Pterocladia tenuis</i> Okamura]                                                                                                                   | +++ | HSA<br>S       | T,S,M,P   |   |   | + | + | ◆                        | Ak, Mz, Swz, SzB, TB     |
| ORDER GIGARTINALES                                                                                                                                                                                                      |     |                |           |   |   |   |   |                          |                          |
| Family Caulacanthaceae                                                                                                                                                                                                  |     |                |           |   |   |   |   |                          |                          |
| <i>Caulacanthus ustulatus</i> (Mertens ex Turner) Kützing ♣                                                                                                                                                             | +++ | EpE<br>z<br>AS | T,S       | + | + |   |   | Ak, Mz, Swz, SzB, TB, TI |                          |
| Family Cystocloniaceae                                                                                                                                                                                                  |     |                |           |   |   |   |   |                          |                          |
| <i>Calliblepharis saidana</i> (Holmes) M.Y. Yang & M.S. Kim [= <i>Hypnea saidana</i> Holmes]                                                                                                                            | ++  | HS             | T,S,I-P   |   |   | + |   | ◆                        | Ak, Swz, SzB             |
| <i>Hypnea asiatica</i> P.J.L. Geraldino, E.C. Yang & S.M. Boo ♣                                                                                                                                                         | ++  | HS             | T,S       |   |   | + |   |                          | Swz                      |
| <i>Hypnea charoides</i> J.V. Lamouroux                                                                                                                                                                                  | ++  | HSA<br>S       | T,S,I-P   |   |   | + | + | ◆                        | Ak, Mz, Swz, SzB, TB     |
| <i>Hypnea esperi</i> Bory ♣                                                                                                                                                                                             | ++  | Ep<br>HS       | T,S,M,An  |   |   | + | + |                          | Swz                      |
| <i>Hypnea spinella</i> (C. Agardh) Kützing ♣                                                                                                                                                                            | ++  | Ez<br>Ep<br>AS | T,S       |   |   | + | + |                          | Swz, Mz, TB              |
| <i>Hypnea valentiae</i> (Turner) Montagne ♣                                                                                                                                                                             | +   | HS             | T,S       |   |   | + | + |                          | Swz                      |
| Family Dicranemataceae                                                                                                                                                                                                  |     |                |           |   |   |   |   |                          |                          |
| <i>Tylopus lichenoides</i> Okamura                                                                                                                                                                                      | +   | HS             | S,P       |   |   |   | + | ◆                        | Swz                      |
| Family Dumontiaceae                                                                                                                                                                                                     |     |                |           |   |   |   |   |                          |                          |
| <i>Dudresnaya japonica</i> Okamura                                                                                                                                                                                      | +   | HSE<br>P       | S,P       |   |   |   | + | ◆                        | Ak, Mz                   |
| Family Endocladaceae                                                                                                                                                                                                    |     |                |           |   |   |   |   |                          |                          |
| <i>Gloiopeltis complanata</i> (Harvey) Yamada                                                                                                                                                                           | ++  | HS             | T,S,I-P   | + |   |   |   | ◆                        | Ak, Swz, SzB, TI         |
| <i>Gloiopeltis furcata</i> (Postels & Ruprecht) J. Agardh                                                                                                                                                               | +++ | HSA<br>S       | T,S,M,I-P | + | + |   |   | ◆                        | Ak, Mz, Swz, SzB, TB, TI |
| <i>Gloiopeltis tenax</i> (Turner) Decaisne                                                                                                                                                                              | ++  | HSA<br>S       | T,S,I-P   | + |   |   |   | ◆                        | Ak, Swz, TB              |
| Family Gigartinaceae                                                                                                                                                                                                    |     |                |           |   |   |   |   |                          |                          |



|                                                                                                                                     |    |                  |          |   |   |   |   |                          |
|-------------------------------------------------------------------------------------------------------------------------------------|----|------------------|----------|---|---|---|---|--------------------------|
| <i>Chondracanthus intermedius</i> (Suringar) Hommersand [= <i>Gigartina intermedia</i> Suringar]                                    | ++ | HSA<br>SEp<br>Ez | T,S,I-P  | + | + | + | ◆ | Ak, Mz, Swz, SzB, TB, TI |
| <i>Chondracanthus tenellus</i> (Harvey) Hommersand [= <i>Gigartina tenella</i> Harvey]                                              | ++ | HSA<br>S         | T,S,I-P  |   | + | + | ◆ | Mz, Swz, SzB, TB, TI     |
| <i>Chondrus giganteus</i> Yendo ♣                                                                                                   | +  | HS               | S,M,P    |   |   |   |   | Mz                       |
| <i>Chondrus ocellatus</i> Holmes ♣                                                                                                  | +  | HS               | T,S,M    |   | + |   |   | Mz, Swz                  |
| <i>Chondrus verrucosus</i> Mikami ♣                                                                                                 | +  | HS               | S,P      |   | + |   |   | Mz                       |
| Family Gloiosiphoniaceae                                                                                                            |    |                  |          |   |   |   |   |                          |
| <i>Gloiosiphonia capillaris</i> (Hudson) Carmichael                                                                                 | +  | HSA<br>S         | T,S,M    |   | + | + | ◆ | TB                       |
| Family Kallymeniaceae                                                                                                               |    |                  |          |   |   |   |   |                          |
| <i>Kallymenia perforata</i> J. Agardh                                                                                               | +  | Ep               | T,S      |   | + |   | ◆ | TB                       |
| Family Phacelocarpaceae                                                                                                             |    |                  |          |   |   |   |   |                          |
| <i>Phacelocarpus japonicus</i> Okamura                                                                                              | +  | HS               | S,P      |   | + | + | ◆ | Swz                      |
| Family Phylloporaceae                                                                                                               |    |                  |          |   |   |   |   |                          |
| <i>Ahnfeltiopsis flabelliformis</i> (Harvey) Masuda [= <i>Gymnogongrus flabelliformis</i> Harvey]                                   | ++ | HSA<br>S         | T,S,I-P  | + | + |   | ◆ | Ak, Mz, Swz, SzB, TB, TI |
| Family Solieriaceae                                                                                                                 |    |                  |          |   |   |   |   |                          |
| <i>Meristotheca papulosa</i> (Montagne) J. Agardh                                                                                   | +  | HS               | T,S,I-P  |   |   |   | ◆ | Swz                      |
| ORDER PLOCAMIALES                                                                                                                   |    |                  |          |   |   |   |   |                          |
| Family Plocamiaceae                                                                                                                 |    |                  |          |   |   |   |   |                          |
| <i>Plocamium cartilagineum</i> (Linnaeus) P.S. Dixon ♣                                                                              | +  | HS               | T,S,M,An |   |   |   |   | Swz                      |
| <i>Plocamium ovicorne</i> Okamura ♣                                                                                                 | +  |                  | S,M,P    |   |   |   |   | Swz                      |
| <i>Plocamium recurvatum</i> Okamura ♣                                                                                               | +  | Ep               | S,P      |   | + |   |   | Swz                      |
| <i>Plocamium telfairiae</i> Harvey                                                                                                  | ++ | Ep<br>HS         | T,S,M,An |   | + | + | ◆ | Mz, Swz, SzB, TB         |
| Family Sarcodiaceae                                                                                                                 |    |                  |          |   |   |   |   |                          |
| <i>Trematocarpus pygmaeus</i> Yendo                                                                                                 | +  | HS               | T,S,P    | + |   |   | ◆ | Mz                       |
| Family Rhizophyllidaceae                                                                                                            |    |                  |          |   |   |   |   |                          |
| <i>Portieria hornemannii</i> (Lyngbye) P.C. Silva                                                                                   | ++ | HSE<br>z         | T,S,I-P  |   | + | + | ◆ | Ak, Mz, Swz, SzB, TB, TI |
| <i>Portieria japonica</i> (Harvey) P.C. Silva ♣                                                                                     | +  | HS               | T,S,P    |   |   | + |   | Swz                      |
| ORDER PEYSSONNELIALES                                                                                                               |    |                  |          |   |   |   |   |                          |
| Family Peyssonneliaceae                                                                                                             |    |                  |          |   |   |   |   |                          |
| <i>Peyssonnelia caulifera</i> Okamura                                                                                               | +  | HS               | T,S,P    |   |   | + | ◆ | Swz, TB                  |
| <i>Peyssonnelia rubra</i> Greville J. Agardh ♣                                                                                      | ++ | EpH<br>SEz       | T,S      |   | + | + |   | Ak, Mz, Swz, SzB, TI     |
| ORDER GRACILARIALES                                                                                                                 |    |                  |          |   |   |   |   |                          |
| Family Gracilariaceae                                                                                                               |    |                  |          |   |   |   |   |                          |
| <i>Agarophyton vermiculophyllum</i> (Ohmi) Gurgel, J.N.Norris et Fredericq [= <i>Gracilaria vermiculophylla</i> (Ohmi) Papenfuss] ♣ | ++ | HSS<br>S         | T,S,M    |   | + |   |   | Ak, Swz, TB, TI          |

|                                                                                                                                           |    |                |           |  |   |   |   |                          |
|-------------------------------------------------------------------------------------------------------------------------------------------|----|----------------|-----------|--|---|---|---|--------------------------|
| <i>Gracilaria parvispora</i> I.A. Abbott ♣                                                                                                | ++ | HSS<br>S       | T,S,P     |  | + |   |   | TB, Swz                  |
| <i>Gracilaria textorii</i> (Suringar) De Toni                                                                                             | +  | HS             | T,S       |  | + | + | ◆ | Ak, Swz                  |
| <i>Gracilariopsis longissima</i> (S.G. Gmelin) M. Seentoft, L.M. Irvine & W.F. Farnham [= <i>Gracilaria verrucosa</i> (Hudson) Papenfuss] | +  |                | T,S,M,An  |  | + |   | ◆ | TB                       |
| <i>Hydropuntia edulis</i> (S.G. Gmelin) Gurgel & Fredericq [= <i>Gracilaria edulis</i> (S.G. Gmelin) P.C. Silva] ♣                        | +  | HS             | T,S,I-P   |  | + |   |   | TB                       |
| ORDER HALYMENIALES                                                                                                                        |    |                |           |  |   |   |   |                          |
| Family Halymeniaceae                                                                                                                      |    |                |           |  |   |   |   |                          |
| <i>Carpopeltis maillardii</i> (Montagne & Millardet) Chiang [= <i>Carpopeltis rigida</i> (Harvey ex J. Agardh) F. Schmitz]                | +  | HS<br>AS       | T,S,I-P   |  | + |   | ◆ | Mz, Swz, TB              |
| <i>Grateloupia asiatica</i> S. Kawaguchi & H.W. Wang ♣                                                                                    | ++ | HS             | T,S       |  | + |   |   | Ak, Mz, TB               |
| <i>Grateloupia carnosa</i> Yamada & Segawa ♣                                                                                              | +  | HS             | T,S,I-P   |  | + |   |   | Swz                      |
| <i>Grateloupia elliptica</i> Holmes ♣                                                                                                     | ++ | HS             | T,S,M,I-P |  | + | + |   | Ak, Mz, Swz, TB, TI      |
| <i>Grateloupia filicina</i> (J.V. Lamouroux) C. Agardh                                                                                    | ++ | HSA<br>S       | T,S,M,An  |  | + |   | ◆ | Ak, Swz, SzB, TB, TI     |
| <i>Grateloupia imbricata</i> Holmes ♣                                                                                                     | ++ | HSA<br>S       | T,S       |  | + |   |   | Ak, Swz, TB, TI          |
| <i>Grateloupia ramosissima</i> Okamura ♣                                                                                                  | +  | HS             | T,S,I-P   |  | + |   |   | Swz                      |
| <i>Grateloupia sparsa</i> (Okamura) Chiang ♣                                                                                              | +  | HSA<br>S       | S,P       |  | + | + |   | Swz, TB                  |
| <i>Pachymeniopsis lanceolata</i> (K. Okamura) Y. Yamada ex S. Kawabata [= <i>Grateloupia lanceolata</i> (Okamura) S. Kawaguchi] ♣         | +  | HSA<br>S       | T,S       |  | + | + |   | TB                       |
| <i>Polyopes affinis</i> (Harvey) Kawaguchi & Wang [= <i>Carpopeltis affinis</i> (Harvey) Okamura]                                         | ++ | HSA<br>S       | T,S,P     |  | + |   | ◆ | Ak, Mz, Swz, SzB, TB, TI |
| <i>Polyopes lancifolius</i> (Harvey) Kawaguchi & Wang [= <i>Grateloupia okamurae</i> Yamada]                                              | +  | HS             | S,M       |  | + |   | ◆ | Swz                      |
| <i>Polyopes prolifer</i> (Hariot) Kawaguchi & Wang [= <i>Carpopeltis prolifera</i> (Hariot) Kawaguchi & Masuda] ♣                         | +  | HS             | S,P       |  | + |   |   | SzB                      |
| ORDER RHODYMENIALES                                                                                                                       |    |                |           |  |   |   |   |                          |
| Family Champiaceae                                                                                                                        |    |                |           |  |   |   |   |                          |
| <i>Champia bifida</i> Okamura ♣                                                                                                           | +  |                | T,S,P     |  | + |   |   | Swz, TI                  |
| <i>Champia expansa</i> Yendo                                                                                                              | +  | Ep             | T,S,P     |  | + |   | ◆ | Swz                      |
| <i>Champia japonica</i> Okamura ♣                                                                                                         | +  | Ez             | T,S,P     |  | + |   |   | Swz                      |
| <i>Champia parvula</i> C. (Agardh) Harvey                                                                                                 | ++ | HS<br>Ep<br>Ez | T,S,M     |  | + | + | ◆ | Ak, Swz, SzB, TB, TI     |
| Family Lomentariaceae                                                                                                                     |    |                |           |  |   |   |   |                          |
| <i>Ceratodictyon intricatum</i> (C. Agardh) R.E. Norris ♣                                                                                 | ++ | HS             | T,S       |  | + | + |   | Ak, Mz, Swz, TB, TI      |
| <i>Ceratodictyon variabile</i> J. Agardh) R.E. Norris [= <i>Gelidiopsis variabilis</i> Greville ex J. Agardh) F. Schmitz] ♣               | +  | HS             | T,S       |  | + |   |   | Swz                      |
| <i>Fushitsunagia catenata</i> (Harvey) Filloramo & G.W. Saunders [= <i>Lomentaria catenata</i> Harvey]                                    | ++ | HSA<br>S       | T,S,I-P   |  | + | + | ◆ | Ak, Mz, Swz, SzB, TB, TI |

|                                                                                                                                 |     |                 |           |    |   |   |   |                      |                          |
|---------------------------------------------------------------------------------------------------------------------------------|-----|-----------------|-----------|----|---|---|---|----------------------|--------------------------|
| <i>Lomentaria hakodatensis</i> Yendo ♣                                                                                          | ++  | HSA<br>S        | T,S,M     |    | + |   |   | SzB, TB              |                          |
| <i>Lomentaria corallicola</i> Børgesen ♣                                                                                        | ++  | HS              | T,S       |    | + | + |   | Swz, SzB             |                          |
| <i>Lomentaria pinnata</i> Segawa ♣                                                                                              | +   | Ep              | T,S,P     |    |   | + |   | Ak, Swz, TB          |                          |
| Family Rhodymeniaceae                                                                                                           |     |                 |           |    |   |   |   |                      |                          |
| <i>Botryocladia wrightii</i> (Harvey) W.E. Schmidt, D.L. Ballantine & Fredericq [= <i>Chrysomenia wrightii</i> (Harvey) Yamada] | +   | HS              | T,S,M     |    |   | + | ◆ | Swz                  |                          |
| <i>Chrysomenia okamurae</i> Yamada & Segawa                                                                                     | +   |                 | T,S       |    |   | + | ◆ | Swz, TB              |                          |
| <i>Chrysomenia kaernbachii</i> Grunow [= <i>Cryptarachne kaernbachii</i> (Grunow) Kylin] ♣                                      | +   | HS              | T,S       |    |   |   |   | TB                   |                          |
| <i>Rhodymenia intricata</i> (Okamura) Okamura ♣                                                                                 | +   | HS              | T,S,I-P   |    |   | + |   | Swz, TB              |                          |
| PHYLUM OCHROPHYTA                                                                                                               |     |                 |           |    |   |   |   |                      |                          |
| CLASS PHAEOPHYCEAE                                                                                                              |     |                 |           |    |   |   |   |                      |                          |
| ORDER ECTOCARPALES                                                                                                              |     |                 |           |    |   |   |   |                      |                          |
| Family Acinetosporaceae                                                                                                         |     |                 |           |    |   |   |   |                      |                          |
| <i>Feldmannia irregularis</i> (Kützing) G. Hamel ♣                                                                              | +++ | ASE<br>P<br>HSA | T,S       |    | + | + | + | Ak, Swz, SzB, TB     |                          |
| <i>Feldmannia mitchelliae</i> (Harvey) H.-S. Kim ♣                                                                              | +++ | S<br>Ep         | T,S,M     |    |   | + | + | Ak, Mz, Swz, SzB, TB |                          |
| Family Chordariaceae                                                                                                            |     |                 |           |    |   |   |   |                      |                          |
| <i>Eudesme virescens</i> (Carmichael ex Berkeley) J. Agardh                                                                     | +   | HS              | S,M,An,Ar |    |   | + | ◆ | Mz, Swz              |                          |
| <i>Leathesia marina</i> (Lyngbye) Decaisne [= <i>Leathesia difformis</i> Areschoug]                                             | ++  | HS<br>Ep        | S,M,Ar    | Ip |   | + | ◆ | Ak, Swz, TB, TI      |                          |
| Family Petrospongiaceae                                                                                                         |     |                 |           |    |   |   |   |                      |                          |
| <i>Petrospongium rugosum</i> (Okamura) Setchell & N.L. Gardner                                                                  | +++ | HS              | T,S,I-P   |    | + | + | ◆ | Mz, TB, TI           |                          |
| Family Scytosiphonaceae                                                                                                         |     |                 |           |    |   |   |   |                      |                          |
| <i>Colpomenia bullosa</i> (De A. Saunders) Yamada                                                                               | +   | HS<br>HSA       | T,S,I-P   |    |   | + | + | ◆                    | TB                       |
| <i>Colpomenia sinuosa</i> (Mertens ex Roth) Derbès & Solier                                                                     | +++ | S<br>Ep         | T,S,M,An  |    |   | + | + | ◆                    | Ak, Mz, Swz, SzB, TB, TI |
| <i>Dactylosiphon wynnei</i> (K.M.Lee, R.Riosmena-Rodriguez, Kogame & S.M. Boo) Santiañez, K.M.Lee, S.M.Boo & Kogame ♣           | +   | HSA<br>S<br>HSA | S,P       |    |   | + | + |                      | Ak, Mz, Swz, SzB, TB     |
| <i>Hydroclathrus clathratus</i> (C. Agardh) M.A. Howe                                                                           | ++  | S<br>Ep         | T,S       |    |   | + | + | ◆                    | Ak, Mz, Swz, SzB, TB, TI |
| <i>Hydroclathrus tenuis</i> C.K. Tseng & Lu ♣                                                                                   | +   | HS              | T,S       |    |   | + | + |                      | Mz, Swz, TB              |
| <i>Myelophycus simplex</i> (Harvey) Papenfuss [= <i>Myelophycus caespitosum</i> Kjellman]                                       | ++  | HSA<br>S<br>Ez  | S,P       |    |   | + | ◆ | Ak, Swz, TB          |                          |
| <i>Petalonia fascia</i> (O.F. Müller) Kuntze                                                                                    | +   | HSA<br>S        | S,M,Ar    |    |   | + | ◆ | Swz, TB              |                          |

|                                                                                                                     |     |                 |          |    |   |   |   |                          |
|---------------------------------------------------------------------------------------------------------------------|-----|-----------------|----------|----|---|---|---|--------------------------|
| <i>Scytosiphon lomentaria</i> (Lyngbye) Link                                                                        | +++ | HSA<br>S        | T,S,M,An | +  | + | + | ◆ | Swz, SzB, TB, TI         |
| ORDER ISHIGEALES                                                                                                    |     |                 |          |    |   |   |   |                          |
| Family Ishigeaceae                                                                                                  |     |                 |          |    |   |   |   |                          |
| <i>Ishige foliacea</i> Okamura                                                                                      | +++ | HSA<br>S        | S,P      | +  | + |   | ◆ | Ak, Mz, Swz, TB, TI      |
| <i>Ishige okamurae</i> Yendo                                                                                        | +++ | HS              | S,P      | Ip | + |   | ◆ | Ak, Swz, SzB, TB, TI,    |
| ORDER RALFSIALES                                                                                                    |     |                 |          |    |   |   |   |                          |
| Family Neoralfsiaceae                                                                                               |     |                 |          |    |   |   |   |                          |
| <i>Neoralfsia expansa</i> (J. Agardh) P.-E. Lim & H. Kawai ex Cormaci & G. Furnari ♣                                | +++ | HS              | T,S      | +  | + |   |   | Ak, Swz, TB, TI          |
| Family Ralfsiaceae                                                                                                  |     |                 |          |    |   |   |   |                          |
| <i>Ralfsia verrucosa</i> (Areschoug) Areschoug ♣                                                                    | +++ | HSA<br>S        | T,S,M,Ar | +  | + |   |   | Mz, Swz, TB, TI          |
| ORDER SPHACELARIALES                                                                                                |     |                 |          |    |   |   |   |                          |
| Family Sphacelariaceae                                                                                              |     |                 |          |    |   |   |   |                          |
| <i>Sphacelaria novae-hollandiae</i> Sonder ♣                                                                        | +++ | EpE<br>z<br>ASE | T,S      | Ip | + |   |   | Swz, TI                  |
| <i>Sphacelaria rigidula</i> Kützing ♣                                                                               | ++  | p<br>Ez         | T,S,M,An | Ip | + | + |   | Ak, Mz, Swz, SzB, TB, TI |
| <i>Sphacelaria tribuloides</i> Meneghini                                                                            | +   | Ep              | T,S      |    | + | + | ◆ | Ak, Mz, Swz              |
| <i>Sphacelaria yamadae</i> Segawa                                                                                   | +   | Ep              | S,M,P    |    |   | + | ◆ | SzB                      |
| ORDER TILOPTERIDALES                                                                                                |     |                 |          |    |   |   |   |                          |
| Family Cutleriaceae                                                                                                 |     |                 |          |    |   |   |   |                          |
| <i>Cutleria adspersa</i> (Mertens ex Roth) De Notaris                                                               |     | HS              | S,M      |    |   | + | ◆ | TI                       |
| <i>Mutimo cylindricus</i> (Okamura) H. Kawai & T. Kitayama [= <i>Cutleria cylindrica</i> Okamura]                   | +   | HS              | T,S,P    |    | + |   | ◆ | TI                       |
| ORDER DICTYOTALES                                                                                                   |     |                 |          |    |   |   |   |                          |
| Family Dictyotaceae                                                                                                 |     |                 |          |    |   |   |   |                          |
| <i>Canistrocarpus cervicornis</i> (Kützing) De Paula & De Clerck ♣                                                  | +   | HS              | T,S      |    | + |   |   | Swz                      |
| <i>Dictyopteris latiuscula</i> (Okamura) Okamura                                                                    | +   | HS              | S,P      |    |   | + | ◆ | SzB                      |
| <i>Dictyopteris polypodioides</i> (A.P. De Candolle) J.V. Lamouroux ♣                                               | +   | HS              | T,S,M    |    |   | + |   | Swz                      |
| <i>Dictyopteris prolifera</i> (Okamura) Okamura                                                                     | +++ | HS              | T,S      |    | + | + | ◆ | Ak, Mz, Swz, SzB, TI     |
| <i>Dictyopteris undulata</i> (Holmes) Okamura                                                                       | ++  | HS              | T,S,P    |    | + | + | ◆ | Ak, Swz, SzB             |
| <i>Dictyota coriacea</i> (Holmes) I.K. Wang, Hy. S. Kim & W.J. Lee [= <i>Pachydictyon coriaceum</i> Holmes Okamura] | +++ | HSA<br>S        | T,S,P    |    | + | + | ◆ | Ak, Mz, Swz, SzB, TB, TI |
| <i>Dictyota dichotoma</i> (Hudson) J.V. Lamouroux                                                                   | ++  | HSA<br>S        | T,S,M,An |    | + | + | ◆ | Ak, Swz, SzB, TB         |
| <i>Dictyota friabilis</i> Setchell ♣                                                                                | ++  | EpH<br>S        | T,S,I-P  |    | + | + |   | Mz, Swz, SzB             |
| <i>Dictyota implexa</i> (Desfontaines) J.V. Lamouroux [= <i>Dictyota divaricata</i> J.V. Lamouroux]                 | +   | HS              | T,S      |    | + | + | ◆ | Swz, SzB                 |

|                                                                                                                           |     |                |          |    |   |   |   |                          |
|---------------------------------------------------------------------------------------------------------------------------|-----|----------------|----------|----|---|---|---|--------------------------|
| <i>Lobophora variegata</i> (J.V. Lamouroux) Womersley ex Oliveira<br>[= <i>Pocockiella variegata</i> Lamouroux Papenfuss] | +   | HSA<br>S<br>Ep | T,S      |    | + | + | ◆ | Swz                      |
| <i>Padina arborescens</i> Holmes                                                                                          | ++  | HSA<br>S       | T,S,I-P  |    | + | + | ◆ | Ak, Mz, Swz, SzB, TB, TI |
| <i>Padina gymnospora</i> (Kützting) Sonder [= <i>Padina crassa</i> Yamada]                                                | +   | HS             | T,S      |    |   | + | ◆ | Mz, TI                   |
| <i>Padina minor</i> Yamada                                                                                                | +   | HS             | T,S,I-P  |    | + | + | ◆ | Ak, Swz, SzB, TI         |
| <i>Zonaria diesingiana</i> J. Agardh                                                                                      | ++  | HS             | T,S,I-P  |    | + | + | ◆ | Mz, Swz, TI              |
| ORDER LAMINARIALES                                                                                                        |     |                |          |    |   |   |   |                          |
| Family Alariaceae                                                                                                         |     |                |          |    |   |   |   |                          |
| <i>Ecklonia kurome</i> Okamura                                                                                            | ++  | HS             | S,M,P    |    |   | + | ◆ | Swz, TI                  |
| <i>Undaria pinnatifida</i> (Harvey) Suringar                                                                              | ++  | HSA<br>S       | S,M      |    | + | + | ◆ | Ak, Mz, TB, TI           |
| ORDER FUCALES                                                                                                             |     |                |          |    |   |   |   |                          |
| Family Sargassaceae                                                                                                       |     |                |          |    |   |   |   |                          |
| <i>Myagropsis myagroides</i> (Mertens ex Turner) Fensholt [= <i>Cystophyllum turneri</i> Yendo]                           | +   | HS             | T,S,M,P  |    |   | + | ◆ | Swz                      |
| <i>Sargassum alternato-pinnatum</i> Yamada                                                                                | +   | HS             | T,S,P    |    |   | + | ◆ | Swz                      |
| <i>Sargassum crispifolium</i> Yamada ♣                                                                                    | +   | HS             | T,S,I-P  |    | + | + |   | Swz                      |
| <i>Sargassum fusiforme</i> (Harvey) Setchell [= <i>Hizikia fusiforme</i> (Harvey) Okamura]                                | +++ | HS             | T,S,I-P  | Ip | + |   | ◆ | Ak, Swz, TB, TI          |
| <i>Sargassum giganteifolium</i> Yamada ♣                                                                                  | +   | HS             | T,S,P    |    |   | + |   | TB                       |
| <i>Sargassum hemiphyllum</i> (Turner) C. Agardh                                                                           | +++ | HS             | T,S,I-P  |    | + | + | ◆ | Ak, Mz, TB, TI           |
| <i>Sargassum horneri</i> (Turner) C. Agardh [= <i>Sargassum filicinum</i> Harvey]                                         | +++ | HS             | T,S,I-P  |    |   | + | ◆ | Ak, Mz, TB, TB, TI       |
| <i>Sargassum macrocarpum</i> C. Agardh ♣                                                                                  | +   | HS             | S,P      |    |   | + |   | Ak, Swz, SzB, TB         |
| <i>Sargassum patens</i> C. Agardh                                                                                         | ++  | HS             | T,S,P    |    |   | + | ◆ | Ak, Mz, SzB, TB, TI      |
| <i>Sargassum piluliferum</i> (Turner) C. Agardh                                                                           | +++ | HS             | T,S,P    |    |   | + | ◆ | Ak, Mz, Swz, SzB, TB, TI |
| <i>Sargassum polycystum</i> C. Agardh ♣                                                                                   | +   | HS             | T,S,I-P  |    | + | + |   | Ak, Swz                  |
| <i>Sargassum siliquastrum</i> (Mertens ex Turner) C. Agardh [= <i>Sargassum tortile</i> (C. Agardh) C. Agardh]            | ++  | HSA<br>S       | T,S,P    |    |   | + | ◆ | Ak, Mz, Swz, TB          |
| <i>Sargassum thunbergii</i> (Mertens ex Roth) Kuntze                                                                      | +++ | HS             | T,S      |    | + | + | ◆ | Ak, Mz, Swz, SzB, TB, TI |
| <i>Sargassum yamadae</i> Yoshida & T. Konno ♣                                                                             | +   | HS             | T,S,P    |    | + | + |   | Swz, SzB, TB, TI         |
| CLASS ULVOPHYCEAE                                                                                                         |     |                |          |    |   |   |   |                          |
| ORDER ULOTRICHALES                                                                                                        |     |                |          |    |   |   |   |                          |
| Family Gomontiaceae                                                                                                       |     |                |          |    |   |   |   |                          |
| <i>Collinsiella cava</i> (Yendo) Printz ♣                                                                                 | +   | HSA<br>S       | T,S,M,Ar |    | + |   |   | SzB, TB                  |
| <i>Monostroma nitidum</i> Wittrock                                                                                        | +++ | HSA<br>S       | T,S      |    | + |   | ◆ | Ak, Mz, Swz, SzB, TB, TI |
| Family Ulotrichaceae                                                                                                      |     |                |          |    |   |   |   |                          |

|                                                                                                                                   |     |                      |             |  |   |   |   |  |                          |
|-----------------------------------------------------------------------------------------------------------------------------------|-----|----------------------|-------------|--|---|---|---|--|--------------------------|
| <i>Ulothrix implexa</i> (Kützing) Kützing ♣                                                                                       | ++  | Ep                   | T,S,M,Ar,An |  | + |   |   |  | Ak, TB                   |
| ORDER ULVALES                                                                                                                     |     |                      |             |  |   |   |   |  |                          |
| Family Kornmanniaceae                                                                                                             |     |                      |             |  |   |   |   |  |                          |
| <i>Blidingia minima</i> (Nägeli ex Kützing) Kylin ♣                                                                               | +   | HSA<br>S             | T,S,M       |  | + |   |   |  | SzB, TB                  |
| Family Ulvellaceae                                                                                                                |     |                      |             |  |   |   |   |  |                          |
| <i>Acrochaete geniculata</i> (N.L. Gardner) O'Kelly ♣♣                                                                            | +   | En                   | T,S,M       |  | + | + |   |  | SzB, Swz                 |
| <i>Ulvella lens</i> P. Crouan & H. Crouan ♣                                                                                       | +   | Ep                   | T,S,M       |  | + |   |   |  | SzB, TB                  |
| <i>Ulvella leptochaete</i> (Huber) R. Nielsen, C.J. O'Kelly & B. Wysor ♣                                                          | ++  | Ep                   | T,S,M,Ar    |  | + |   |   |  | TB                       |
| <i>Ulvella viridis</i> (Reinke) R. Nielsen, C.J. O'Kelly & B. Wysor ♣                                                             | ++  | Ep<br>En             | T,S,M,Ar,An |  | + |   |   |  | Ak, Swz, SzB, TB         |
| <i>Ulvella scutata</i> (Reinke) R. Nielsen, C.J. O'Kelly & B. Wysor<br>[= <i>Pringsheimiella scutata</i> (Reinke) Marchewianka] ♣ | +   | Ep                   | T,S,M,Ar    |  | + |   |   |  | Swz, TB                  |
| Family Ulvaceae                                                                                                                   |     |                      |             |  |   |   |   |  |                          |
| <i>Ulva australis</i> Areschoug [= <i>Ulva pertusa</i> Kjellman]                                                                  | ++  | HSA<br>S             | T,S,M,Ar,An |  | + | + | ◆ |  | Mz, Swz, SzB, TB         |
| <i>Ulva chaetomorphoides</i> (Börgesen) Hayden, Blomster, Maggs, P.C. Silva, M.J. Stanhope & J.R. Waaland ♣♣                      | +   | HS                   | T,S         |  | + |   |   |  | Swz                      |
| <i>Ulva clathrata</i> (Roth) C. Agardh ♣                                                                                          | +++ | HSA<br>S<br>Ep<br>Ez | T,S,M,Ar,An |  | + | + | + |  | Ak, Mz, Swz, SzB, TB, TI |
| <i>Ulva compressa</i> Linnaeus ♣                                                                                                  | ++  | HS<br>Ez             | T,S,M,Ar,An |  | + | + |   |  | Mz, Swz, SzB, TB         |
| <i>Ulva conglobata</i> Kjellman                                                                                                   | ++  | HSA<br>S             | T,S,I-P     |  | + | + | ◆ |  | TB, Swz, SzB, TI         |
| <i>Ulva flexuosa</i> Wulfen ♣                                                                                                     | +++ | HSA<br>S<br>EpE<br>z | T,S,M,Ar,An |  | + | + |   |  | Ak, Mz, Swz, SzB, TB, TI |
| <i>Ulva intestinalis</i> Linnaeus ♣                                                                                               | ++  | HSA<br>S<br>Ep       | T,S,M,Ar,An |  | + | + |   |  | Ak, Swz, TB              |
| <i>Ulva lactuca</i> Linnaeus                                                                                                      | +++ | HSA<br>S<br>Ez       | T,S,M,Ar    |  | + | + | ◆ |  | Mz, Swz, SzB, TB         |
| <i>Ulva linza</i> Linnaeus                                                                                                        | ++  | HSA<br>S             | T,S,M,Ar,An |  | + | + | ◆ |  | TB                       |
| <i>Ulva prolifera</i> O.F. Müller ♣                                                                                               | +++ | HSA<br>S<br>Ez       | T,S,M,Ar    |  | + | + |   |  | Ak Mz Swz TB , TI        |
| <i>Ulva ralfsii</i> (Harvey) Le Jolis ♣♣                                                                                          | +   | HS                   | T,S,M       |  | + |   |   |  | SzB TI                   |
| <i>Ulva rigida</i> C. Agardh ♣                                                                                                    | +   | HS<br>AS             | T,S,M,Ar,An |  | + |   |   |  | Mz, TB                   |

|                                                                                                             |    |                   |             |    |   |   |   |                            |
|-------------------------------------------------------------------------------------------------------------|----|-------------------|-------------|----|---|---|---|----------------------------|
| <i>Percursaria percursa</i> (C. Agardh) Rosenvinge ♣                                                        | ++ | Fl                | T,S,M,Ar    | Ip |   |   |   | Swz, SzB, TB               |
| ORDER CLADOPHORALES                                                                                         |    |                   |             |    |   |   |   |                            |
| Family Anadyomenaceae                                                                                       |    |                   |             |    |   |   |   |                            |
| <i>Anadyomene wrightii</i> Harvey ex J.E. Gray ♣                                                            | +  | Ep                | T,S,I-P     |    |   | + |   | Swz                        |
| <i>Microdictyon japonicum</i> Setchell                                                                      | +  | HSE<br>P          | T,S,I-P     | Ip | + | + | ◆ | Swz                        |
| Family Boodleaceae                                                                                          |    |                   |             |    |   |   |   |                            |
| <i>Boodlea coacta</i> (Dickie) G. Murray & De Toni ♣                                                        | +  | HS<br>Ez          | T,S         |    | + | + |   | Swz, TB                    |
| <i>Cladophoropsis membranacea</i> (Hofman Bang ex C. Agardh) Børgesen ♣                                     | +  | Ep                | T,S         |    | + |   |   | SzB                        |
| <i>Cladophoropsis sundanensis</i> Reinbold ♣                                                                | ++ | Ep<br>Ez          | T,S         |    | + | + |   | Mz, Swz, TB                |
| <i>Phyllocladion anastomosans</i> (Harvey) Kraft et & M.J. Wynne ♣                                          | +  | HSE<br>P          | T,S         |    | + | + |   | Swz, SzB                   |
| Family Cladophoraceae                                                                                       |    |                   |             |    |   |   |   |                            |
| <i>Chaetomorpha aerea</i> (Dillwyn) Kützing [= <i>Chaetomorpha crassa</i> (C. Agardh) Kützing]              | ++ | HSE<br>P          | T,S,M,Ar,An |    | + | + | ◆ | Swz, TB                    |
| <i>Chaetomorpha javanica</i> Kützing ♣♣                                                                     | +  | HS<br>Ep          | T,S         |    | + |   |   | SzB                        |
| <i>Chaetomorpha minima</i> F.S. Collins & Hervey ♣                                                          | +  | Ep                | T,S         |    |   | + |   | Swz                        |
| <i>Cladophora flexuosa</i> (O.F. Müller) Kützing ♣                                                          | ++ | HSA<br>S Ep<br>Ez | T,S,M, An   |    | + | + |   | Ak, Mz, Swz, SzB, TB, TI   |
| <i>Cladophora laetevirens</i> (Dillwyn) Kützing ♣                                                           | +  | HS<br>EpE<br>z    | T,S,M       |    |   | + | + | Swz SzB TB, TI             |
| <i>Cladophora rugulosa</i> G. Martens ♣                                                                     | +  | HS                | T,S,I-P     | Ip |   | + |   | Swz                        |
| <i>Cladophora vagabunda</i> (Linnaeus) Hoek ♣                                                               | ++ | HSA<br>S Ep       | T,S,M       | Ip |   | + |   | Swz, SzB, TB, TI           |
| <i>Rhizoclonium riparium</i> var. <i>implexum</i> (Dillwyn) Rosenvinge ♣                                    | ++ | ASE<br>P          | T,S,M       | Ip |   | + | + | Ak, Swz, SzB, TB, TI       |
| Family Pseudocladophoraceae                                                                                 |    |                   |             |    |   |   |   |                            |
| <i>Pseudocladophora conchopheria</i> (Sakai) Boedeker & Leliaert [= <i>Cladophora conchopheria</i> Sakai] ♣ | ++ | Ez                | S,P         |    |   | + |   | Ak, TB, TI                 |
| Family Siphonocladaceae                                                                                     |    |                   |             |    |   |   |   |                            |
| <i>Dictyosphaeria cavernosa</i> (Forsskål) Børgesen                                                         | ++ | HS                | T,S         |    |   | + | + | ◆ Ak, Mz, Swz, SzB, TB, TI |
| <i>Siphonocladus rigidus</i> M.A. Howe ♣                                                                    | +  | HSE<br>P          | T,S         |    | + | + |   | SzB, TI                    |
| ORDER BRYOPSIDALES                                                                                          |    |                   |             |    |   |   |   |                            |
| Family Bryopsidaceae                                                                                        |    |                   |             |    |   |   |   |                            |
| <i>Bryopsis pennata</i> J.V. Lamouroux ♣                                                                    | +  | AS                | T,S         |    |   | + | + | Mz, SzB                    |
| <i>Bryopsis plumosa</i> (Hudson) C. Agardh ♣                                                                | +  | HS                | T,S,M,Ar,An |    |   |   | + | TB                         |

|  |                                                                                                                         |     |          |          |    |   |                            |
|--|-------------------------------------------------------------------------------------------------------------------------|-----|----------|----------|----|---|----------------------------|
|  |                                                                                                                         |     | AS       |          |    |   |                            |
|  | Family Codiaceae                                                                                                        |     |          |          |    |   |                            |
|  | <i>Codium coactum</i> Okamura ♣                                                                                         | +   | HS       | S,P      | +  |   | SzB                        |
|  | <i>Codium cylindricum</i> Holmes                                                                                        | ++  | HS       | T,S,P    |    | + | ◆ Ak, Mz, Swz, SzB, TB, TI |
|  | <i>Codium fragile</i> (Suringar) Hariot                                                                                 | ++  | HS       | T,S,M    |    | + | ◆ Ak, Mz, Swz, TB, TI      |
|  | <i>Codium geppiorum</i> O.C. Schmidt [= <i>Codium divaricatum</i> A. Gepp & E. Gepp]                                    | ++  | HS       | T,S,I-P  | +  | + | ◆ Mz, Swz                  |
|  | <i>Codium intricatum</i> Okamura                                                                                        | ++  |          | T,S,I-P  |    | + | ◆ Swz, SzB, TI             |
|  | <i>Codium repens</i> P. Crouan & H. Crouan ♣                                                                            | +   | HSA<br>S | T,S      | +  | + | TB                         |
|  | <i>Codium tenue</i> (Kützinger) Kützinger                                                                               | +   | HS       | T,S,I-P  |    | + | ◆ Mz, TB                   |
|  | Family Derbesiaceae                                                                                                     |     |          |          |    |   |                            |
|  | <i>Derbesia marina</i> (Lyngbye) Solier ♣                                                                               | +   | Ep       | T,S,M,Ar | +  |   | Swz, SzB, TI               |
|  | Family Caulerpaceae                                                                                                     |     |          |          |    |   |                            |
|  | <i>Caulerpa ambigua</i> Okamura ♣                                                                                       | +   | Ep       | T,S      |    |   | Swz, TI                    |
|  | <i>Caulerpa brachypus</i> Harvey                                                                                        | +   | HS       | T,S      |    | + | ◆ Swz, SzB                 |
|  | <i>Caulerpa subserrata</i> Okamura ♣                                                                                    | +++ | HS       | T,S,P    | +  | + | ◆ Ak, Swz, SzB, TI         |
|  | <i>Caulerpa webbiana</i> f. <i>tomentella</i> (Harvey ex J. Agardh) Weber-van Bosse                                     | +++ | HS       | T,S,I-P  | +  | + | ◆ Ak, Swz, SzB, TI         |
|  | Family Udoteaceae                                                                                                       |     |          |          |    |   |                            |
|  | <i>Rhipidosiphon javensis</i> Montagne [= <i>Udotea javensis</i> (Montagne) A. Gepp & E.S. Gepp]                        | +   | HS       | T,S      | +  | + | ◆ SzB                      |
|  | ORDER DASYCLADALES                                                                                                      |     |          |          |    |   |                            |
|  | Family Polyphysaceae                                                                                                    |     |          |          |    |   |                            |
|  | <i>Parvocaulis parvulus</i> (Solms-Laubach) S. Berger, Fettweiss, Gleissberg, Liddle, U. Richter, Sawitzky & Zuccarello | +   | HS       | T,S      | Ip | + | ◆ Swz, TI                  |
|  | [= <i>Acetabularia moebii</i> Solms-Laubach, <i>A. parvula</i> Solms-Laubach]                                           |     |          |          |    |   |                            |

The abundance of taxa (**At**): rare sightings (+); common (++); abundant (+++). Distribution of species in the geographical zones (**Dg**): **T** – tropical; **S** – subtropical; **M** – temperate; **Ar** – Arctic; **An** – Antarctic; **T,S,M,Ar,An** – from tropics to Arctic and Antarctic; **T,S,M,An** – from tropics to Antarctic; **T,S,M** – from tropics to temperate zones; **T,S** – tropics and subtropics of Atlantic, Indian and Pacific Oceans; **T,S,(I-P)** – tropical and subtropical Indo-Pacific. Tidal zone: (**um**) – the upper and middle intertidal zones; (**l**) – the lower intertidal zone; (**s**) – the upper subtidal zone. Life forms (**Lf**): **As** – algae growing on artificial substrates; **Ep** – epiphytic algae; **En** – endophytic algae; **Ez** – epizoic algae (algae growing on shells); **HS** – algae growing on hard substrate (epilithic); **Fl** – floating algae; **Ip** – algae growing in intertidal pools; **SS** – algae growing on soft substrates. Column “Species, varieties and forms”: New records: ♣ – for Amakusa Island, ♣♣ – for Japan. Column “Locality abbreviations”: Akaiwa, **Ak**; Magarizaki, **Mz**; Shikizaki Bay, **SzB**; Shiraiwazaki, **Swz**; Tomioka Bay, **TB**; Tsujishima Islet, **TI**.
